# Supplementary material for: Dehydrated Prussian blues for CO2 storage and separation applications
Source: Royal Society of Chemistry journal article supplement (doi:10.1039/c0ce00199f), 2010-01-01
Supplement: c0ce00199f.pdf [file c0ce00199f.pdf]

**Supporting Information for *CrystEngComm*,**

**Dehydrated Prussian Blue's for CO<sub>2</sub> Storage and Separation Applications**

Radha Kishan Motkuri,<sup>†</sup> Praveen K. Thallapally<sup>†,\*</sup>, B. Peter McGrail,<sup>†</sup> and S. Behrooz Ghorishi<sup>‡</sup>

*Energy and Environment Directorate, Pacific Northwest National Laboratory, Richland, WA 99352, USA.*

*Fax: 509 3765368; Tel: +1 509 371 7183; <sup>‡</sup> The Babcock and Wilcox Company, Barberton, Ohio 44203*

RECEIVED DATE (automatically inserted by publisher); Add Author E-mail: [Praveen.Thallapally@pnl.gov](mailto:Praveen.Thallapally@pnl.gov)

**Figure S1-S4.** PXRD's CuCo, NiCo and MnCo

**Figure S5-S7.** DSC results of MnCo, NiCo and CuCo

**Figure S8-S10.** TG-MS of three molecular magnets after exposing to air.

**Figure S11-S13.** Diffuse Reflectance Infrared Fourier Transform Spectroscopy (DRIFTS) spectra of MnCo, NiCo and CuCo.

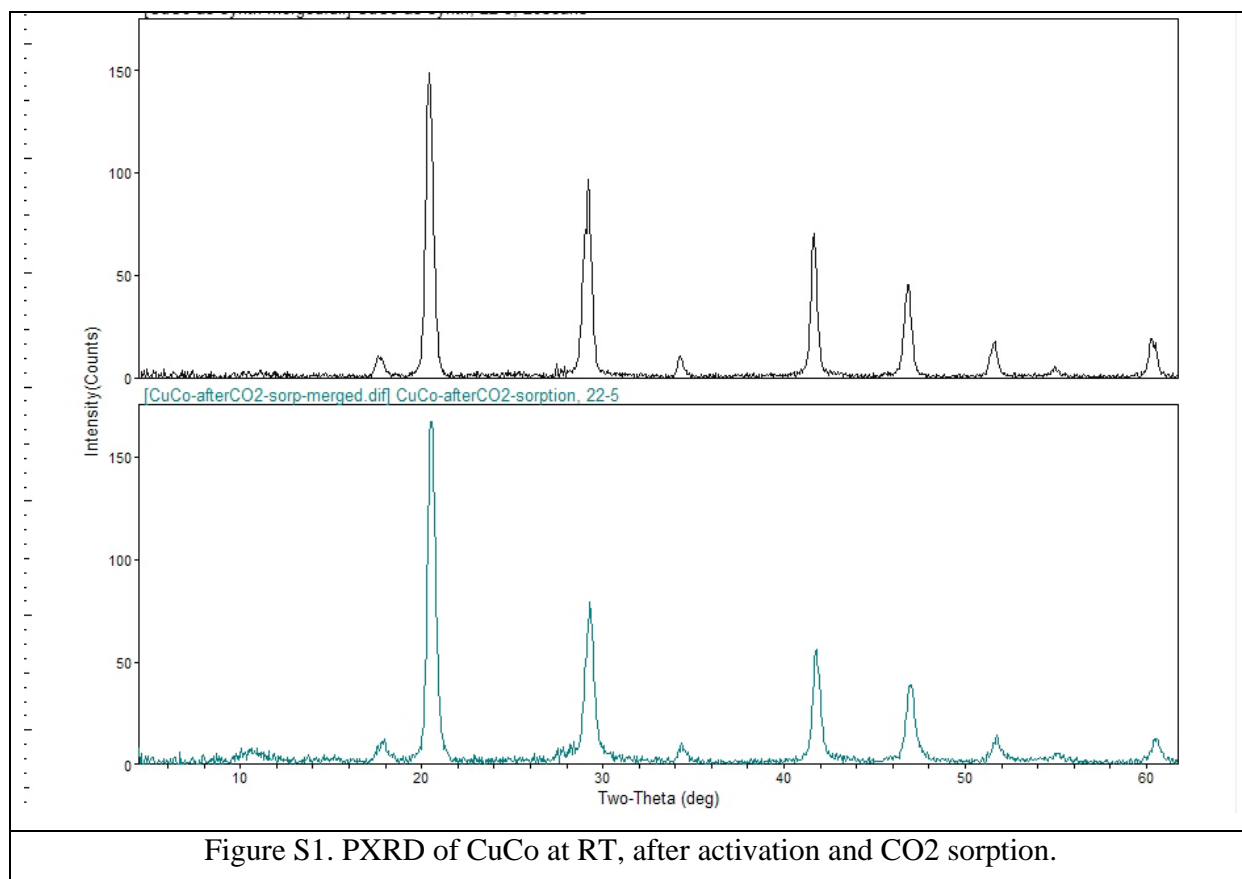

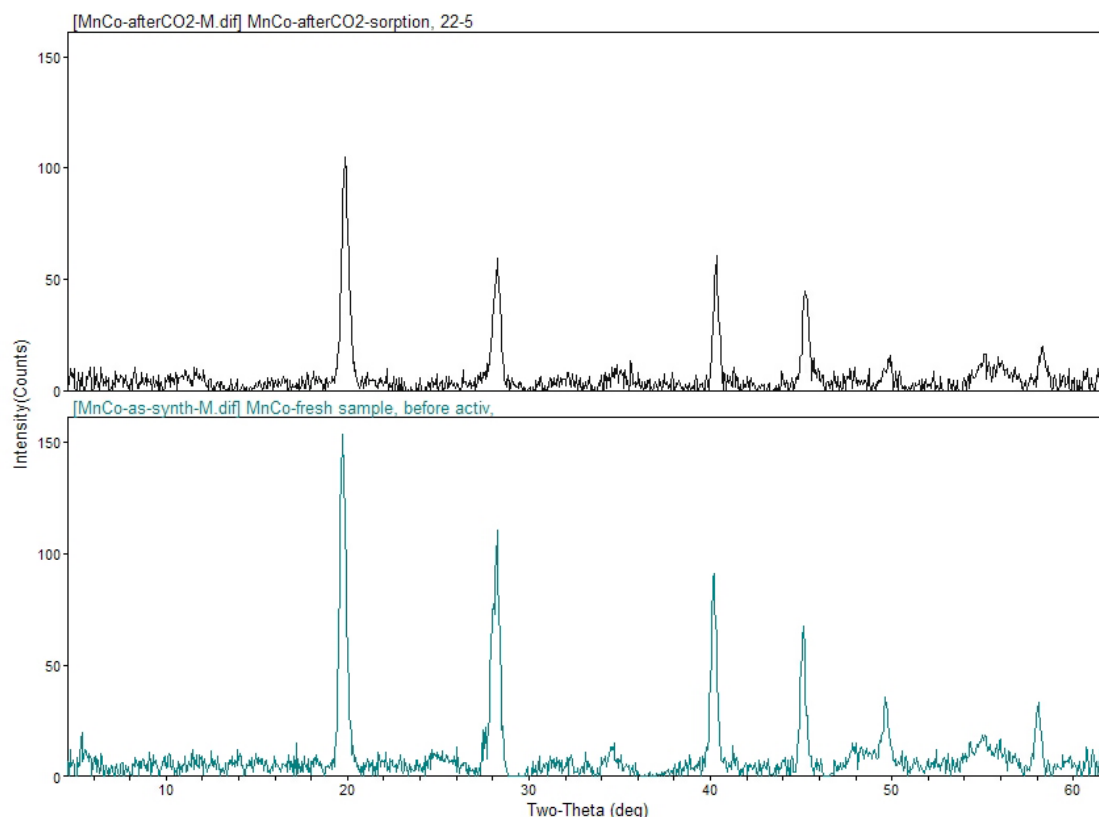

Figure S2. PXRD of MnCo at RT, after activation and CO<sub>2</sub> sorption.

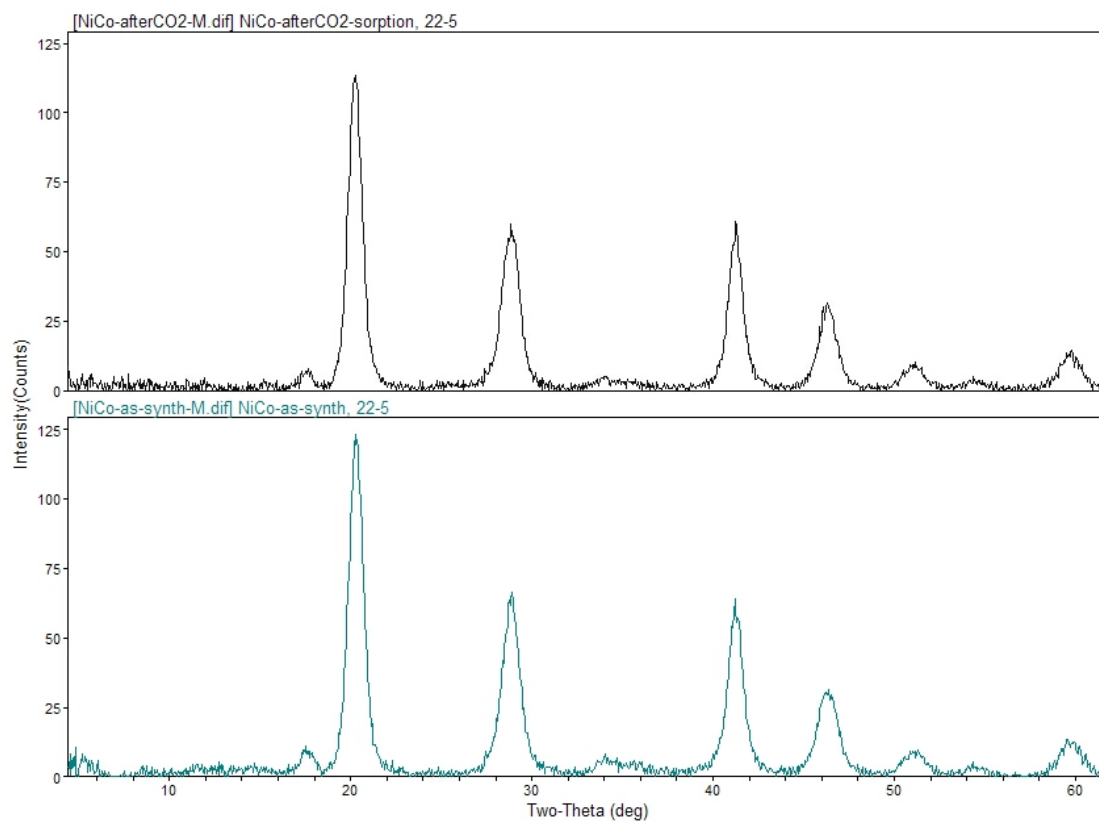

Figure S3. PXRD of NiCo at RT, after activation and CO<sub>2</sub> sorption.

(6) [MnCo-afterCO2-M.dif] MnCo-afterCO2-sorption, 22-5  
(5) [MnCo-as-synth-M.dif] MnCo-fresh sample, before activ.  
(4) [NiCo-afterCO2-M.dif] NiCo-afterCO2-sorption, 22-5  
(3) [NiCo-as-synth-M.dif] NiCo-as-synth, 22-5  
(2) [CuCo-afterCO2-sorp-merged.dif] CuCo-afterCO2-sorption, 22-5  
(1) [CuCo-as-synth-merged.dif] CuCo-as-synth, 22-5, 20scans

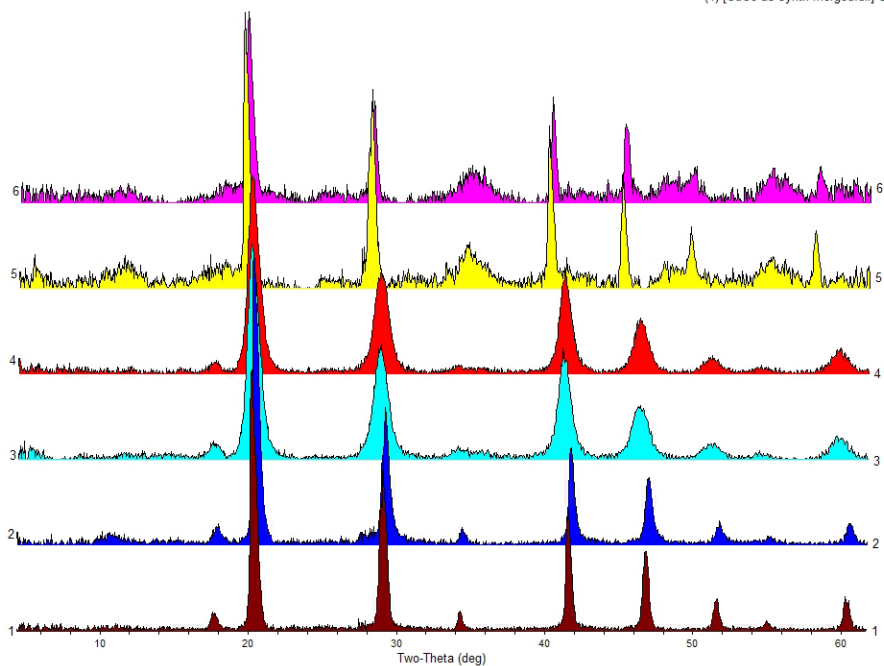

Figure S4. PXRD's of all Prussian blue analogues.

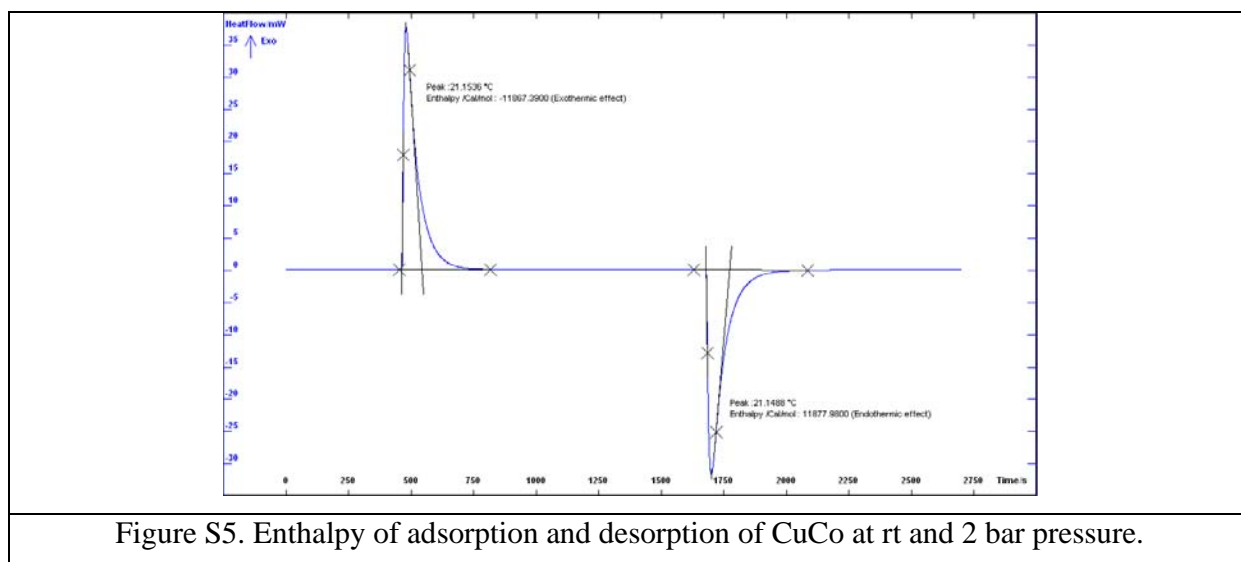

Figure S5. Enthalpy of adsorption and desorption of CuCo at rt and 2 bar pressure.

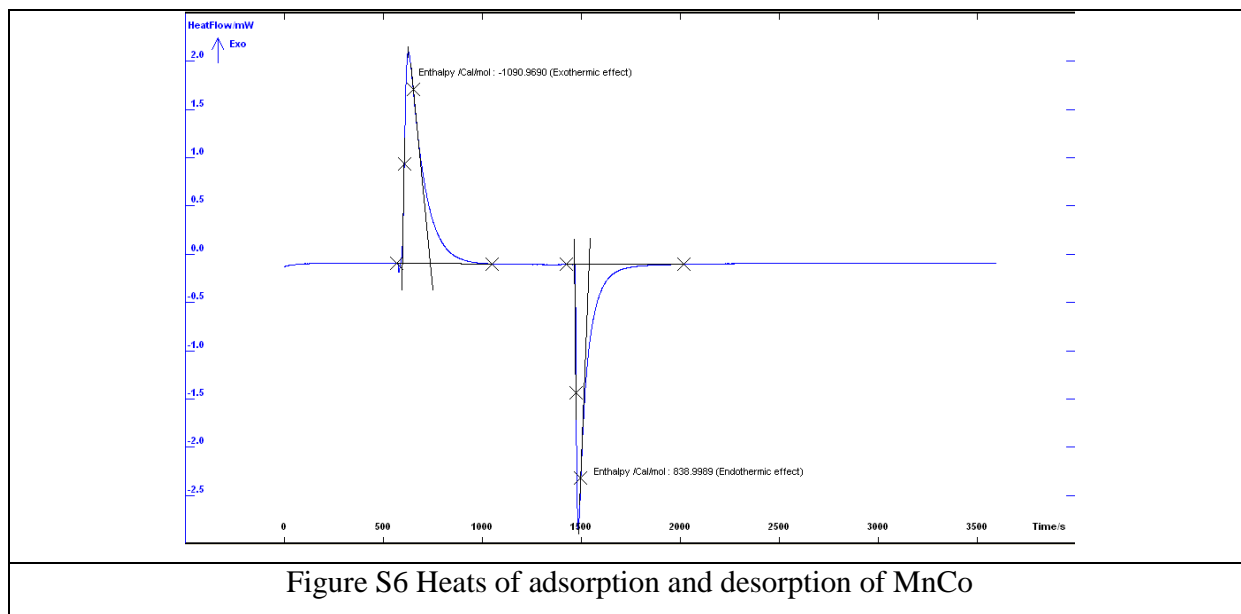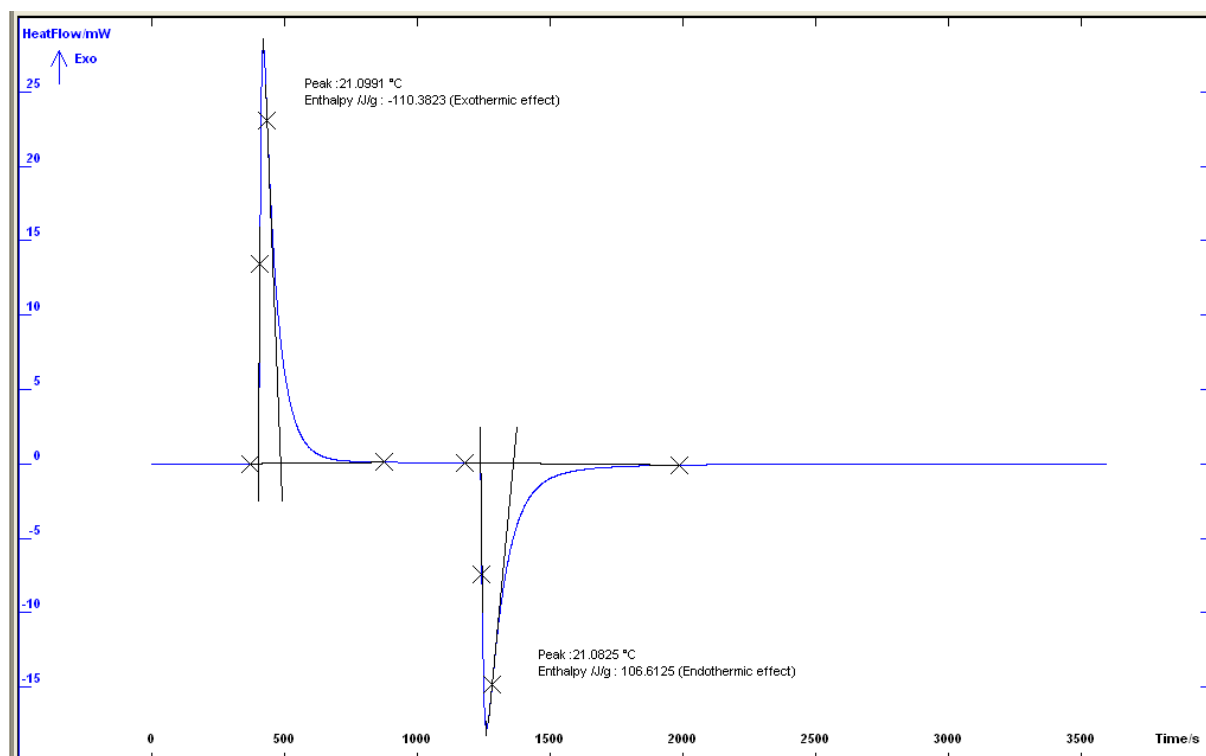

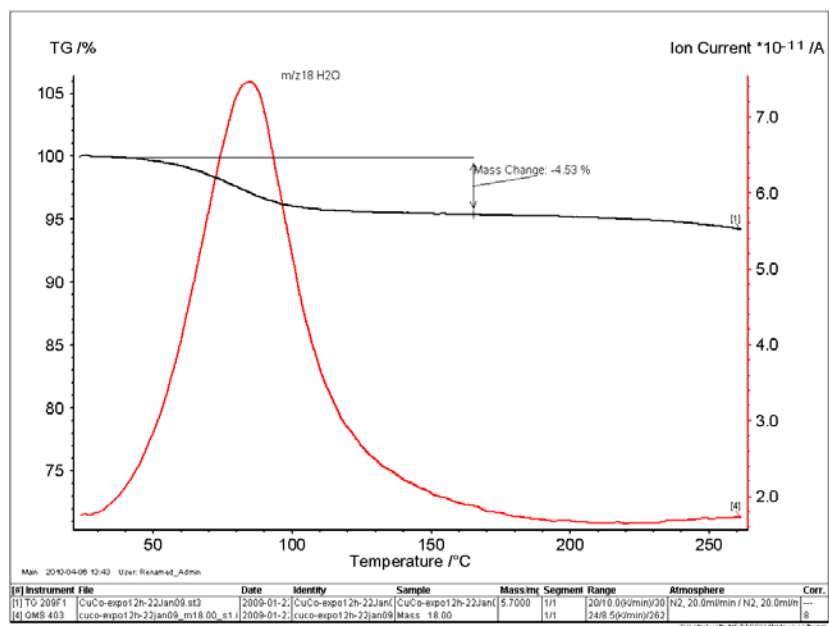

Figure S8. CuCo exposed to air for 12 hrs (after activation at 200C).

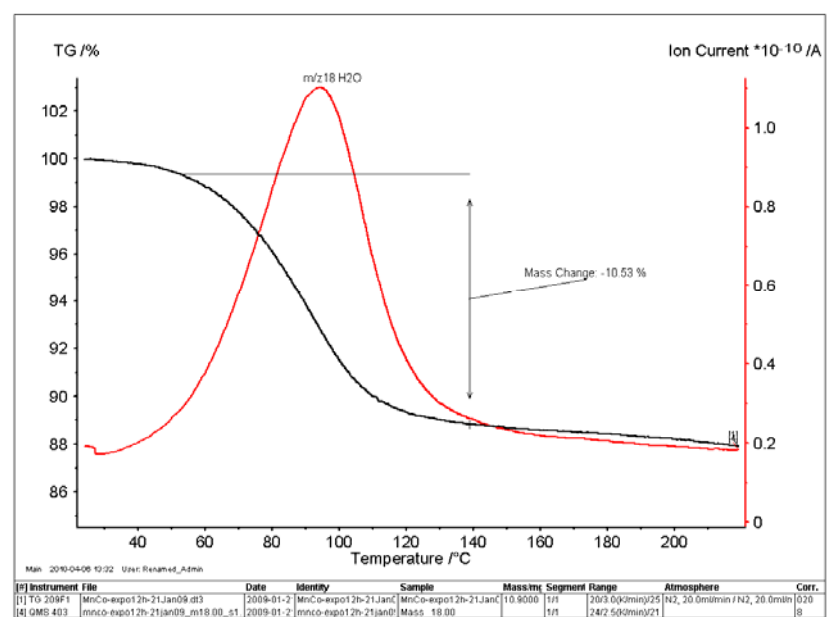

Figure S9. MnCo exposed to air for 12 hrs (after activation at 200C).

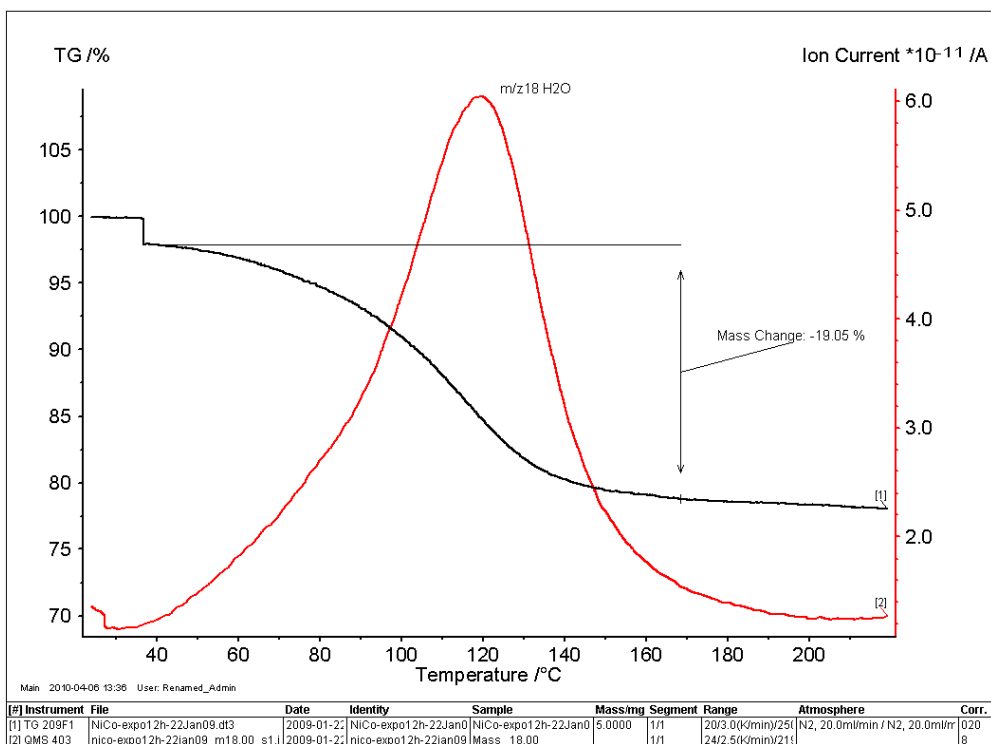

Figure S10. NiCo exposed to air for 12 hrs (after activation at 200C).



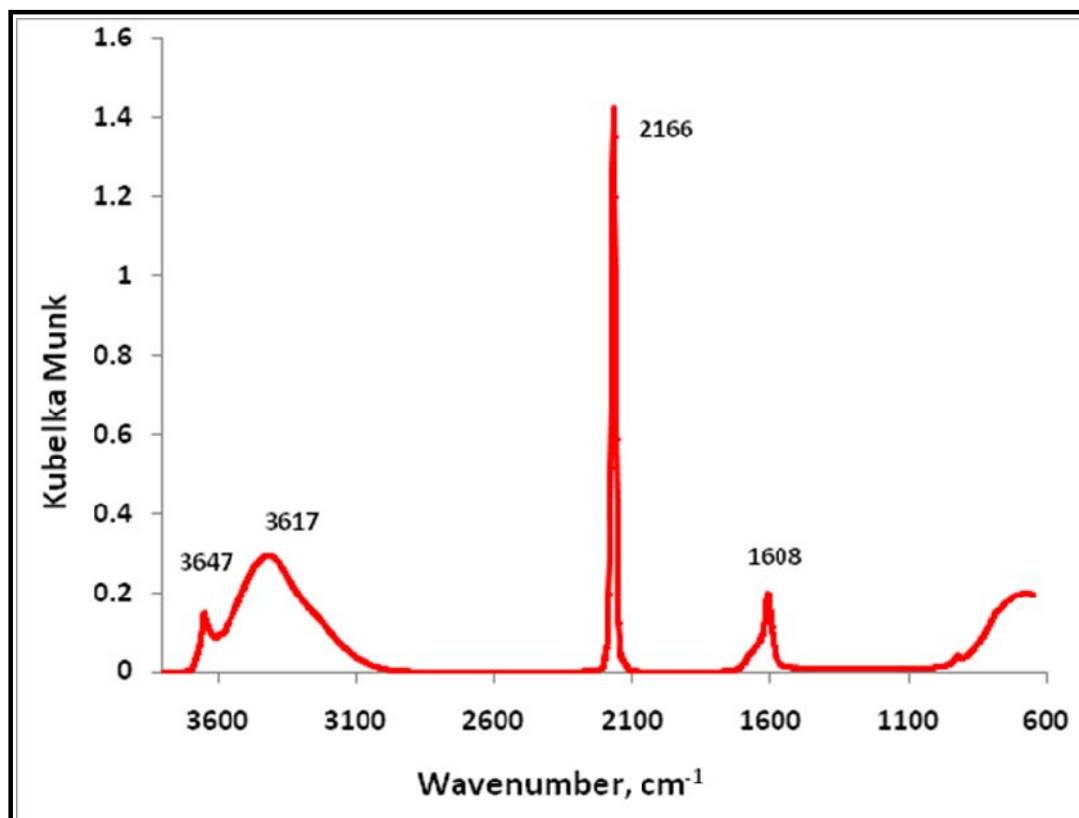

Figure S11. DRIFT spectra of MnCo sample

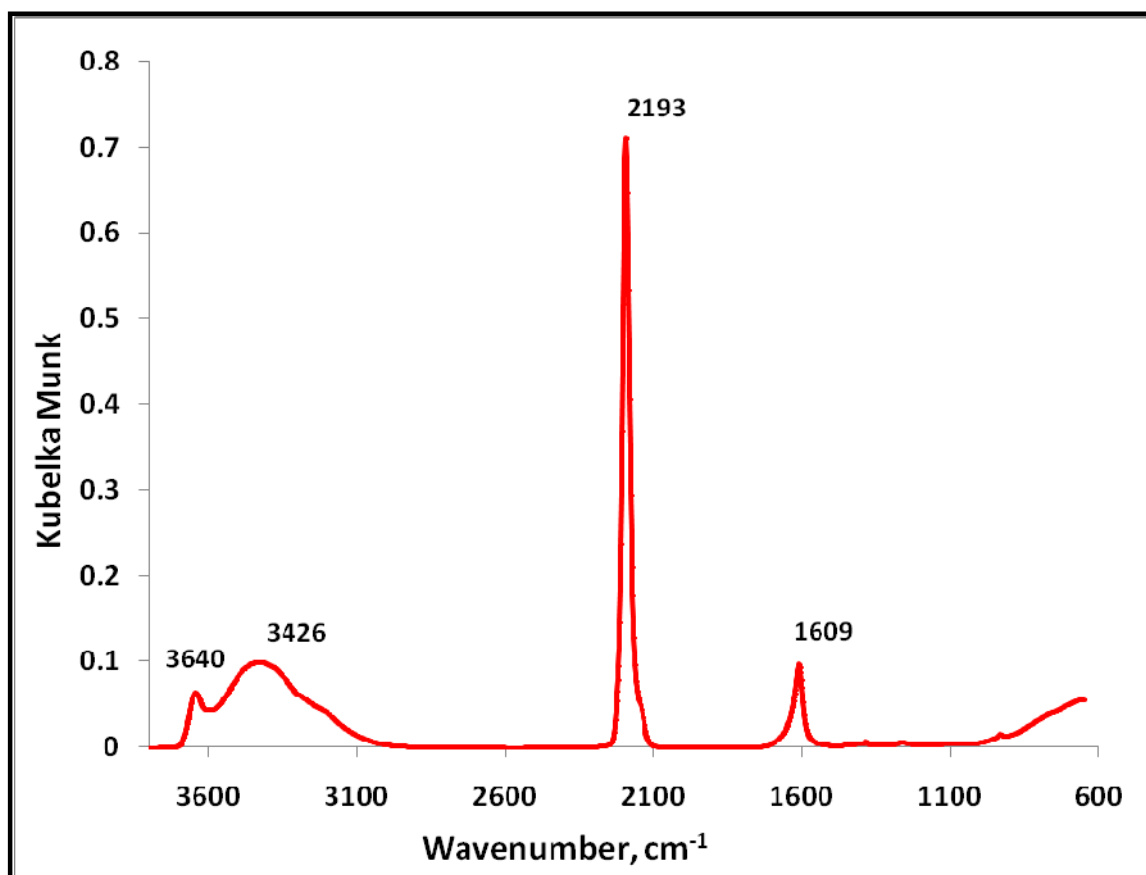

Figure S12. DRIFT spectra of CuCo sample.

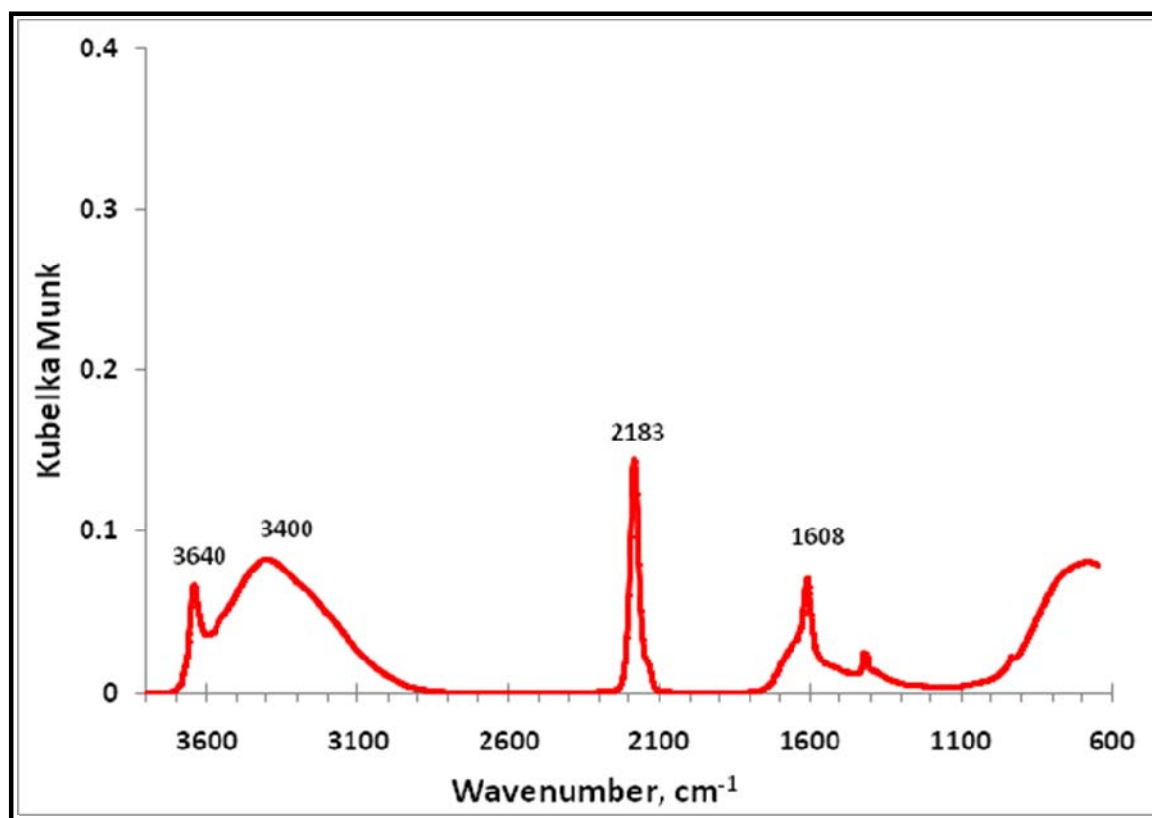

Figure S13. DRIFT spectra of NiCo sample.
